# Supplementary material for: Database of literature derived cellular measurements from the murine basal ganglia
Source: PubMed Central journal article supplement (PMC7338524; doi:10.1038/s41597-020-0550-3), 2020-07-06
Supplement: 41597_2020_550_MOESM2_ESM.pdf [file 41597_2020_550_MOESM2_ESM.pdf]

## Search strings used for literature search

### 1 Search 1 – initial overall search (Performed January 2018)

(Exp rat/ OR exp mouse/ OR mouse OR mice OR rat OR rats)

#### AND

(Striatum.tw,kf. OR neostriatum.tw,kf. OR “caudate putamen”.tw,kf. OR caud\*putamen.tw,kf. OR accumbens.tw,kf. OR “ventral pallidum”.tw,kf. OR “substantia innominata”.tw,kf. OR innominata.tw,kf. OR paleostriatum.tw,kf. OR pallid\*.tw,kf. OR “globus pallidus”.tw,kf. OR entopeduncul\*.tw,kf. OR subthalam\*.tw,kf. OR “substantia nigra”.tw,kf. OR “luys’ nucleus”.tw,kf. OR “luys’ body”.tw,kf. OR “corpus luisy”.tw,kf. OR “basal ganglia”.tw,kf. OR “basal nuclei”.tw,kf. OR “whole-brain”.tw,kf. OR wholebrain.tw,kf. OR “brain-wide”.tw,kf. OR brainwide.tw,kf.)

#### AND

(Immuno\*chem\* OR histochem\* OR histolog\* OR immunofluoresc\* OR fluoresc\* OR cytochem\* OR “electron microscop\*”.tw,kf. OR ultrastructur\* OR cytoarchitect\* or chemoarchitect\* OR “single-cell label\*”.tw,kf. OR “intracellular label\*”.tw,kf. OR “in situ hybridi\*”.tw,kf. OR (golgi ajd3 stain\*).tw,kf.)

#### AND

((number\* or counted or counting or densit\* or distribution\* or stereolog\* or quantita\* or quantific\*) adj5 (cell\* or neuron\* or synapse\* or bouton\* or spine\*)).tw,kf.)

## **2 Search 2 – extended substantia nigra search**

### **Part 1 (performed August 2018)**

((Exp rat/ OR exp mouse/ OR mouse OR mice OR rat OR rats)

**AND**

("substantia nigra".tw,kf. OR "basal ganglia".tw,kf. OR "basal nuclei".tw,kf. OR "whole-brain".tw,kf. OR wholebrain.tw,kf. OR "brain-wide".tw,kf. OR brainwide.tw,kf.)

**AND**

(Immuno\*chem\* OR histochem\* OR histolog\* OR immunofluoresc\* OR fluoresc\* OR cytochem\* OR "electron microscop\*".tw,kf. OR ultrastructur\* OR cytoarchitect\* or chemoarchitect\* OR "single-cell label\*".tw,kf. OR "intracellular label\*".tw,kf. OR "in situ hybridi\*".tw,kf. OR (golgi ajd3 stain\*).tw,kf.)

**AND**

((number\* or counted or counting or densit\* or distribution\* or stereolog\* or quantita\* or quantific\*) adj5 (cell\* or neuron\* or synapse\* or bouton\* or spine\*).tw,kf.))

### **Part 2 (performed August 2018)**

("substantia nigra".tw,kf. AND stereolog\*)

### **3 Search 3 – extended striatum search**

#### **Part 1 (performed December 2018)**

(Exp rat/ OR exp mouse/ OR mouse OR mice OR rat OR rats)

**AND**

(Striatum.tw,kf. OR neostriatum.tw,kf. OR “caudate putamen”.tw,kf. OR caud\*putamen.tw,kf OR “basal ganglia”.tw,kf. OR “basal nuclei”.tw,kf. OR “whole-brain”.tw,kf. OR wholebrain.tw,kf. OR “brain-wide”.tw,kf. OR brainwide.tw,kf.)

**AND**

(Immuno\*chem\* OR histochem\* OR histolog\* OR immunofluoresc\* OR fluoresc\* OR cytochem\* OR “electron microscop\*”.tw,kf. OR ultrastructur\* OR cytoarchitect\* or chemoarchitect\* OR “single-cell label\*”.tw,kf. OR “intracellular label\*”.tw,kf. OR “in situ hybridi\*”.tw,kf. OR (golgi ajd3 stain\*).tw,kf.)

**AND**

((number\* or counted or counting or densit\* or distribution\* or stereolog\* or quantita\* or quantific\*) adj5 (cell\* or neuron\* or synapse\* or bouton\* or spine\*).tw,kf.)

#### **Part 2 (performed January 2019)**

(Striatum.tw,kf. OR neostriatum.tw,kf. OR “caudate putamen”.tw,kf. OR caud\*putamen.tw,kf OR “basal ganglia”.tw,kf. OR “basal nuclei”.tw,kf. OR “whole-brain”.tw,kf. OR wholebrain.tw,kf. OR “brain-wide”.tw,kf. OR brainwide.tw,kf.)

**AND**

stereolog\*
