# Supplementary material for: Database of literature derived cellular measurements from the murine basal ganglia
Source: PubMed Central journal article supplement (PMC7338524; doi:10.1038/s41597-020-0550-3), 2020-07-06
Supplement: 41597_2020_550_MOESM3_ESM.pdf [file 41597_2020_550_MOESM3_ESM.pdf]

| Relevance | Repository name                 | Data | Metadata | Derived data | Anchoring possibility | New analysis required | Content description                                                                                                                                                             | Status                        |
|-----------|---------------------------------|------|----------|--------------|-----------------------|-----------------------|---------------------------------------------------------------------------------------------------------------------------------------------------------------------------------|-------------------------------|
| High      | <u>Neuromorpho.org</u>          |      |          |              |                       | No                    | 544 neurons from adult, control animals, from a total of 14 different laboratories. Each neuron comes with a reconstruction file, metadata, and derived data (measures)         | Included                      |
| High      | <u>Mouse Brain Architecture</u> |      |          |              |                       | No                    | The Cell Type Portal contains an atlas of distribution of inhibitory neural cell types, for which metadata and derived data (cell counts) are available                         | Included                      |
| High      | <u>Allen Institute</u>          |      |          |              |                       | Yes                   | Genome-wide in situ hybridisation data available, at least 91 data sets are potentially relevant (target structure search). Cell morphology data so far from non-BG areas only. | Not included, no derived data |
