# Supplementary material for: Database of literature derived cellular measurements from the murine basal ganglia
Source: PubMed Central journal article supplement (PMC7338524; doi:10.1038/s41597-020-0550-3), 2020-07-06
Supplement: 41597_2020_550_MOESM4_ESM.pdf [file 41597_2020_550_MOESM4_ESM.pdf]

## Region comparability score

| Score     | Relationship types |                     | Criteria                                                                                                                                                                                              |
|-----------|--------------------|---------------------|-------------------------------------------------------------------------------------------------------------------------------------------------------------------------------------------------------|
| <b>0</b>  | Non-overlapping    |                     | The regions are non-overlapping                                                                                                                                                                       |
| <b>1</b>  | Overlapping        |                     | The regions have very little of their respective areas shared (<20%) <i>and</i> precise area of overlap hard to define                                                                                |
| <b>2</b>  |                    |                     | The regions have very little of respective areas shared (<20%) <i>or</i> precise area of overlap hard to define                                                                                       |
| <b>3</b>  |                    |                     | Regions sharing more than approximately 20% of their respective areas, with non-overlapping parts easily defined                                                                                      |
| <b>4</b>  | Overlapping        | Part of<br>Includes | Overlapping regions that share more than approximately 40% of their respective areas, with non-overlapping parts easily defined<br><br>Part-of / includes relationships with very low coverage (>20%) |
| <b>5</b>  |                    |                     | Overlapping regions that share more than approximately 60%, with non-overlapping parts easily defined<br><br>Part of / includes relationships with approximately 25% coverage                         |
| <b>6</b>  |                    |                     | Overlapping areas that share more than 80% of their respective areas<br><br>Part of / includes relationship with approximately 50% coverage                                                           |
| <b>7</b>  | Part of / includes |                     | Part of / includes relationships with more than approximately 70% coverage                                                                                                                            |
| <b>8</b>  | Identical          |                     | Small, non-overlapping regions (>20%)                                                                                                                                                                 |
| <b>9</b>  |                    |                     | Small, non-overlapping regions (>10%)                                                                                                                                                                 |
| <b>10</b> |                    |                     | No visible regions of non-overlap                                                                                                                                                                     |
