# Supplementary material for: Database of literature derived cellular measurements from the murine basal ganglia
Source: PubMed Central journal article supplement (PMC7338524; doi:10.1038/s41597-020-0550-3), 2020-07-06
Supplement: 41597_2020_550_MOESM5_ESM.pdf [file 41597_2020_550_MOESM5_ESM.pdf]

## Calculation of volumetric densities

In many cases, cell counts were reported as numbers per square millimeter. To obtain a volumetric density and facilitate comparison with other density estimates, we converted these numbers. For the numbers that had not been corrected for double-counting, we applied a correction as follows:

$$N = \frac{n \times T}{T + D}$$

Where  $N$  is the cell number,  $n$  is the number of counted profiles,  $T$  is the thickness of the sections, and  $D$  is the mean diameter of the profiles. As we could not know the diameter of cells counted for each study, we used  $15 \mu\text{m}$  as an approximation.

The corrected 2D cell counts were then used to calculate the volumetric density as follows:

$$vN = \frac{n}{T}$$

Where  $vN$  is the volumetric density,  $n$  is the corrected 2D cell count, and  $T$  is the thickness of the sections.
